# Supplementary material
Source: Springer Nature journal article supplement (https://www.springermedizin.de/resource/supplementary/13044_2010_22_MOESM1_ESM.pdf/9659972)

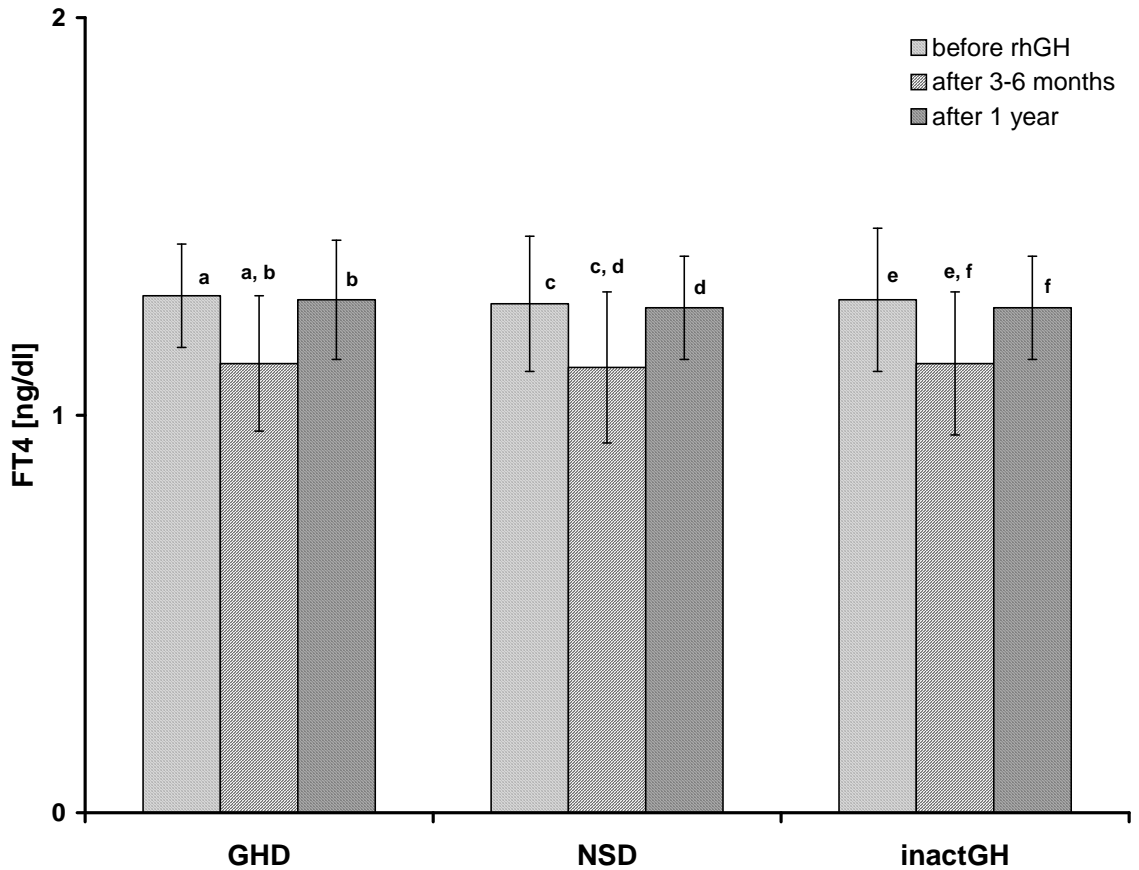

Significant differences: a –  $p < 0.00001$ ; b –  $p < 0.0001$ ; c, d, e, f –  $p < 0.005$

Supplement: MOESM1 [file 9659972]
